# Supplementary material for: Terminal crystalline solid solutions, solubility enhancements and T–X phase diagram of salicylic acid – 4-hydroxybenzoic acid
Source: Royal Society of Chemistry journal article supplement (doi:10.1039/d3cp04909d), 2023-12-28
Supplement: d3cp04909d1.pdf [file d3cp04909d1.pdf]

## **Supporting information for “Terminal Crystalline Solid Solutions and T-X Phase Diagrams of Salicylic acid - 4-Hydroxybenzoic acid”**

Yongjian Wang, Francesco Ricci, Brian Linehan and Fredrik L Nordstrom

Table 1. DSC results for SA-4HBA. Average values and standard deviations in parenthesis

| X(4HBA)<br>mol<br>AA/mol<br>SA+4HBA | DSC<br>endotherms                    | Low temperature endotherm |                    |                   |                               |                   | High temperature endotherm |                    |                   |                     |                  |
|-------------------------------------|--------------------------------------|---------------------------|--------------------|-------------------|-------------------------------|-------------------|----------------------------|--------------------|-------------------|---------------------|------------------|
|                                     |                                      | T <sub>inset</sub>        | T <sub>onset</sub> | T <sub>peak</sub> | T <sub>offset</sub>           | Enthalpy          | T <sub>inset</sub>         | T <sub>onset</sub> | T <sub>peak</sub> | T <sub>offset</sub> | Enthalpy         |
|                                     |                                      | °C                        | °C                 | °C                | °C                            | J/g               | °C                         | °C                 | °C                | °C                  | J/g              |
| 0.00                                | One endotherm                        |                           |                    |                   |                               |                   | 154.07<br>(0.08)           | 158.64<br>(0.006)  | 159.16<br>(0.09)  | 160.98<br>(0.23)    | 189.56<br>(4.21) |
| 0.00062                             | One endotherm                        |                           |                    |                   |                               |                   | 154.25<br>(0.56)           | 158.57<br>(0.02)   | 159.14<br>(0.04)  | 161.92<br>(0.79)    | 187.66<br>(1.56) |
| 0.0011                              | One endotherm                        |                           |                    |                   |                               |                   | 152.11<br>(0.18)           | 158.53<br>(0.01)   | 159.18<br>(0.11)  | 161.15<br>90.23)    | 182.65<br>(3.81) |
| 0.0022                              | One endotherm                        |                           |                    |                   |                               |                   | 153.49<br>(0.41)           | 158.46<br>(0.05)   | 159.21<br>(0.12)  | 161.56<br>(0.22)    | 179.59<br>(4.47) |
| 0.0036                              | Two separated endotherms             | 141.07<br>(0.50)          | 142.73<br>(0.10)   | 143.76<br>(0.06)  | 144.72<br>(0.12)              | 0.79<br>(0.22)    | 151.43<br>(0.87)           | 158.07<br>(0.09)   | 159.04<br>(0.14)  | 160.80<br>(0.35)    | 172.00<br>(2.87) |
| 0.0062                              | Two separated endotherms             | 140.97<br>(0.47)          | 142.14<br>(0.06)   | 143.20<br>(0.08)  | 144.78<br>(0.18)              | 1.76<br>(0.21)    | 148.87<br>(0.43)           | 157.69<br>(0.03)   | 158.73<br>(0.06)  | 160.58<br>(0.13)    | 167.83<br>(1.33) |
| 0.0153                              | Two partially overlapping endotherms | 141.53<br>(0.13)          | 142.72<br>(0.12)   | 143.65<br>(0.04)  | 145.08 <sup>1</sup><br>(0.14) | 7.08<br>(0.57)    | 149.12<br>(1.03)           | 154.88<br>(2.13)   | 158.13<br>(0.12)  | 161.39<br>(2.26)    | 161.49<br>(8.28) |
| 0.0303                              | Two partially overlapping endotherms | 140.98<br>0.34)           | 143.00<br>(0.05)   | 143.87<br>(0.02)  | 145.87 <sup>1</sup><br>(0.19) | 21.49<br>(1.97)   |                            | 154.28<br>(0.40)   | 157.26<br>(0.09)  | 159.14<br>(0.24)    | 153.28<br>(0.47) |
| 0.0398                              | Two partially overlapping endotherms | 140.35<br>(0.62)          | 143.68<br>(1.15)   | 143.87<br>(0.13)  | 145.66 <sup>1</sup><br>(0.06) | 30.91<br>(3.84)   |                            | 152.80<br>(0.73)   | 156.34<br>(0.33)  | 158.64<br>(0.35)    | 144.72<br>(6.36) |
| 0.0516                              | Two partially overlapping endotherms | 141.05<br>(0.79)          | 143.00<br>(0.04)   | 143.95<br>(0.09)  | 145.60 <sup>1</sup><br>(0.27) | 38.91<br>(2.80)   |                            | 152.46<br>(1.95)   | 155.49<br>(0.61)  | 157.62<br>(0.27)    | 132.90<br>(9.23) |
| 0.0964                              | Two partially overlapping endotherms | 141.30<br>(0.04)          | 143.16<br>(0.04)   | 144.37<br>(0.05)  |                               | 74.30<br>(1.05)   |                            |                    | 153.65<br>(0.68)  | 156.18<br>(0.31)    | 97.74<br>(2.29)  |
| 0.2069                              | Two endotherms mostly overlapping    | 141.65<br>(0.20)          | 143.27<br>(0.01)   | 144.68<br>(0.22)  |                               | 132.31<br>(1.40)  |                            |                    | 148.58<br>(1.72)  | 149.99<br>(1.58)    | 42.45<br>(1.11)  |
| 0.2241                              | Two endotherms mostly overlapping    | 141.59<br>(0.47)          | 143.34<br>(0.06)   | 144.68<br>(0.29)  |                               | 138.96<br>(2.54)  |                            |                    |                   | 150.28<br>(1.18)    | 25.68<br>(16.40) |
| 0.2496                              | Two endotherms mostly overlapping    | 140.22<br>(0.16)          | 143.40<br>(0.21)   | 144.48<br>(0.17)  |                               | 164.54<br>(12.04) |                            |                    |                   | 151.59<br>(2.21)    | 12.47<br>(2.99)  |
| 0.2745                              | Two endotherms mostly overlapping    | 141.20<br>(0.24)          | 143.32<br>(0.09)   | 144.58<br>(0.20)  |                               | 161.29<br>(0.71)  |                            |                    |                   | 148.65<br>(0.80)    | 4.18<br>(5.12)   |

|        |                                      |                  |                  |                  |                               |                   |                  |                   |                  |                  |                   |
|--------|--------------------------------------|------------------|------------------|------------------|-------------------------------|-------------------|------------------|-------------------|------------------|------------------|-------------------|
| 0.2939 | Two partially overlapping endotherms | 140.54<br>(0.14) | 143.23<br>(0.01) | 144.65<br>(0.02) |                               | 173.34<br>(6.29)  |                  |                   |                  | 162.88<br>(1.57) | 16.78<br>(5.86)   |
| 0.3966 | Two partially overlapping endotherms | 140.08<br>(0.85) | 143.28<br>(0.15) | 144.58<br>(0.07) | 147.84 <sup>1</sup><br>(0.08) | 146.62<br>(10.33) |                  |                   | 165.46<br>(8.98) | 174.54<br>(6.18) | 28.93<br>(13.14)  |
| 0.4995 | Two mostly separated endotherms      | 140.92<br>(0.13) | 143.15<br>(0.05) | 144.40<br>(0.21) | 146.42 <sup>1</sup><br>(0.41) | 107.74<br>(2.26)  |                  | 180.44<br>(10.25) | 189.78<br>(8.68) | 194.24<br>(7.93) | 34.76<br>(4.74)   |
| 0.6062 | Two mostly separated endotherms      | 140.96<br>(0.41) | 143.09<br>(0.02) | 144.16<br>(0.06) | 146.23 <sup>1</sup><br>(0.13) | 88.35<br>(3.12)   |                  | 186.45<br>(8.66)  | 193.83<br>(3.44) | 200.62<br>(2.59) | 63.17<br>(8.37)   |
| 0.7081 | Two mostly separated endotherms      | 140.30<br>(0.16) | 143.10<br>(0.01) | 144.13<br>(0.10) | 146.24 <sup>1</sup><br>(0.29) | 73.31<br>(3.39)   |                  | 185.61<br>(3.68)  | 195.18<br>(1.01) | 201.16<br>(0.86) | 82.24<br>(2.35)   |
| 0.8011 | Two mostly separated endotherms      | 139.96<br>(0.11) | 143.10<br>(0.01) | 144.01<br>(0.08) | 146.01 <sup>1</sup><br>(0.06) | 43.49<br>(1.59)   |                  | 205.98<br>(5.52)  | 209.68<br>(3.50) | 213.40<br>(2.00) | 139.68<br>(13.71) |
| 0.9040 | Two separated endotherms             | 139.50<br>(0.51) | 142.64<br>(0.02) | 143.54<br>(0.04) | 145.09<br>(0.22)              | 15.60<br>(1.84)   | 205.24<br>(0.62) | 211.94<br>(0.66)  | 213.44<br>(0.28) | 215.20<br>(0.30) | 189.91<br>(3.21)  |
| 0.9505 | Two separated endotherms             | 139.87<br>(0.58) | 142.94<br>(0.59) | 143.79<br>(0.17) | 144.95<br>(0.17)              | 5.92<br>(0.47)    | 208.12<br>(0.90) | 213.76<br>(0.22)  | 214.88<br>(0.18) | 216.88<br>(0.16) | 207.97<br>(3.18)  |
| 0.9704 | Two separated endotherms             | 140.53<br>(0.16) | 142.18<br>(0.09) | 143.54<br>(0.14) | 144.64<br>(0.12)              | 2.75<br>(0.42)    | 207.68<br>(0.57) | 213.31<br>(0.13)  | 214.52<br>(0.11) | 216.40<br>(0.20) | 212.75<br>(0.46)  |
| 0.9812 | One endotherm                        |                  |                  |                  |                               |                   | 206.54<br>(1.09) | 212.85<br>(0.40)  | 214.40<br>(0.21) | 216.36<br>(0.19) | 210.51<br>(8.24)  |
| 0.9845 | One endotherm                        |                  |                  |                  |                               |                   | 209.43<br>(1.24) | 214.15<br>(0.14)  | 214.95<br>(0.15) | 216.99<br>(0.26) | 214.89<br>(5.31)  |
| 0.9911 | One endotherm                        |                  |                  |                  |                               |                   | 208.24<br>(0.48) | 213.77<br>(0.11)  | 214.67<br>(0.02) | 216.46<br>(0.24) | 217.24<br>(2.21)  |
| 0.9952 | One endotherm                        |                  |                  |                  |                               |                   | 210.61<br>(0.57) | 214.36<br>(0.28)  | 215.16<br>(0.13) | 216.95<br>(0.27) | 223.91<br>(5.34)  |
| 1.000  | One endotherm                        |                  |                  |                  |                               |                   | 213.29<br>(0.54) | 215.22<br>(0.02)  | 215.49<br>(0.07) | 217.33<br>(0.30) | 222.87<br>(6.78)  |

1. Estimated offset temperature as the endotherm never returns to the baseline. The mid-point between endotherms is used as an approximation of the baseline offset temperature of the low-temperature endotherm when the endotherms increasingly overlap. This separation also provides the calculation of the enthalpy of both the low- and high-temperature endotherms

Table 2. Solid-Liquid Equilibria for SA-4HBA Anhydrate in ACN at 20°C

| Solid phase      | Liquid        | Solid         | Liquid          | Solid           | Conc. of SA     | Conc. of 4HBA     | X(SA)               | A(4HBA)               | X(solvent)              |
|------------------|---------------|---------------|-----------------|-----------------|-----------------|-------------------|---------------------|-----------------------|-------------------------|
|                  | w% 4HBA in SA | w% 4HBA in SA | mol% 4HBA in SA | mol% 4HBA in SA | mg SA/g solvent | mg 4HBA/g solvent | mmol SA/(mol total) | mmol 4HBA/(mol total) | mol solvent/(mol total) |
| SA               | 0.000%        | 0.000%        | 0.000%          | 0.000%          | 92.27           | 0.00              | 26.6910             | 0.0000                | 0.9733                  |
| $\alpha$         | 0.392%        | 0.012%        | 0.392%          | 0.012%          | 86.15           | 0.34              | 24.9620             | 0.0982                | 0.9749                  |
| $\alpha$         | 1.611%        | 0.017%        | 1.611%          | 0.017%          | 102.09          | 1.67              | 29.4337             | 0.4820                | 0.9701                  |
| $\alpha$         | 3.953%        | 0.038%        | 3.953%          | 0.038%          | 93.36           | 3.84              | 26.9689             | 1.1098                | 0.9719                  |
| $\alpha$         | 8.605%        | 0.046%        | 8.605%          | 0.046%          | 107.19          | 10.09             | 30.7852             | 2.8984                | 0.9663                  |
| $\alpha$         | 6.778%        | 0.071%        | 6.778%          | 0.071%          | 110.52          | 8.04              | 31.7294             | 2.3070                | 0.9660                  |
| $\alpha$         | 16.426%       | 0.100%        | 16.426%         | 0.100%          | 105.34          | 20.70             | 30.1776             | 5.9311                | 0.9639                  |
| $\alpha$         | 26.630%       | 0.159%        | 26.630%         | 0.159%          | 115.86          | 42.05             | 32.8906             | 11.9376               | 0.9552                  |
| $\alpha$         | 26.459%       | 0.166%        | 26.459%         | 0.166%          | 117.28          | 42.20             | 33.2788             | 11.9735               | 0.9547                  |
| $\alpha$         | 28.293%       | 0.171%        | 28.293%         | 0.171%          | 99.80           | 39.38             | 28.4835             | 11.2384               | 0.9603                  |
| $\alpha$         | 20.458%       | 0.193%        | 20.458%         | 0.193%          | 112.91          | 29.04             | 32.1998             | 8.2815                | 0.9595                  |
| $\alpha + \beta$ | 34.387%       | 0.555%        | 34.387%         | 0.555%          | 128.29          | 67.24             | 36.0356             | 18.8857               | 0.9451                  |
| $\alpha + \beta$ | 34.019%       | 20.038%       | 34.019%         | 20.038%         | 126.10          | 65.02             | 35.4643             | 18.2852               | 0.9463                  |
| $\alpha + \beta$ | 34.182%       | 22.717%       | 34.182%         | 22.717%         | 129.35          | 67.18             | 36.3226             | 18.8634               | 0.9448                  |
| $\alpha + \beta$ | 34.504%       | 56.387%       | 34.504%         | 56.387%         | 127.89          | 67.38             | 35.9255             | 18.9263               | 0.9451                  |
| $\alpha + \beta$ | 34.466%       | 76.699%       | 34.466%         | 76.699%         | 119.30          | 62.74             | 33.6356             | 17.6898               | 0.9487                  |
| $\alpha + \beta$ | 34.517%       | 99.336%       | 34.517%         | 99.336%         | 126.07          | 66.45             | 35.4418             | 18.6818               | 0.9459                  |
| $\beta$          | 40.829%       | 99.648%       | 40.829%         | 99.648%         | 86.09           | 59.41             | 24.5267             | 16.9239               | 0.9585                  |
| $\beta$          | 43.870%       | 99.725%       | 43.870%         | 99.725%         | 88.94           | 69.52             | 25.2458             | 19.7314               | 0.9550                  |
| $\beta$          | 49.685%       | 99.790%       | 49.685%         | 99.790%         | 58.55           | 57.81             | 16.8194             | 16.6085               | 0.9666                  |
| $\beta$          | 77.932%       | 99.938%       | 77.932%         | 99.938%         | 14.20           | 50.16             | 4.1421              | 14.6272               | 0.9812                  |
| $\beta$          | 93.321%       | 99.964%       | 93.321%         | 99.964%         | 3.34            | 46.63             | 0.9772              | 13.6545               | 0.9854                  |
| 4HBA Anhydrate   | 100.00%       | 100.00%       | 100.00%         | 100.00%         | 0.00            | 44.97             | 0.0000              | 13.1890               | 0.9868                  |

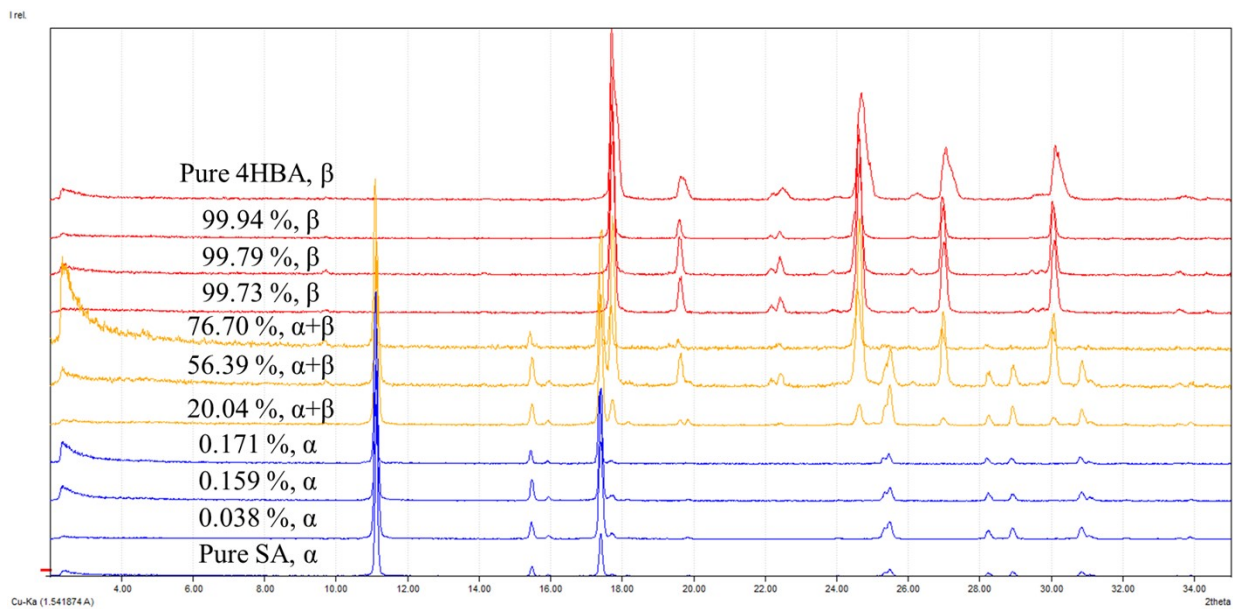

Figure 1. XRPD of SA-4HBA (Anhydrate) of (select) solid phase samples from SLE study in ACN

Table 3. Solid-Liquid Equilibria for SA-4HBA Hydrate in 40 w% MeOH in H2O at 20°C

| Solid phase        | Liquid        | Solid         | Liquid          | Solid           | Conc. of SA     | Conc. of 4HBA      | X(SA)                | A(4HBA)                 | X(solvent)               |
|--------------------|---------------|---------------|-----------------|-----------------|-----------------|--------------------|----------------------|-------------------------|--------------------------|
|                    | w% 4HBA in SA | w% 4HBA in SA | mol% 4HBA in SA | mol% 4HBA in SA | mg SA/g solvent | mg 4HBA /g solvent | mmol SA/ (mol total) | mmol 4HBA / (mol total) | mol solvent/ (mol total) |
| SA                 | 0.00%         | 0.00%         | 0.00%           | 0.00%           | 22.91           | 0.00               | 3.6098               | 0.0000                  | 0.9964                   |
| $\alpha$           | 11.88%        | 0.047%        | 11.88%          | 0.047%          | 24.15           | 3.26               | 3.8022               | 0.5126                  | 0.9957                   |
| $\alpha$           | 16.19%        | 0.051%        | 16.19%          | 0.051%          | 24.44           | 4.72               | 3.8463               | 0.7430                  | 0.9954                   |
| $\alpha$           | 19.99%        | 0.057%        | 19.99%          | 0.057%          | 23.70           | 5.92               | 3.7302               | 0.9318                  | 0.9953                   |
| $\alpha$           | 28.15%        | 0.085%        | 28.15%          | 0.085%          | 24.48           | 9.59               | 3.8507               | 1.5087                  | 0.9946                   |
| $\alpha$           | 28.47%        | 0.086%        | 28.47%          | 0.086%          | 25.75           | 10.25              | 4.0485               | 1.6117                  | 0.9943                   |
| $\alpha$           | 36.65%        | 0.103%        | 36.65%          | 0.103%          | 26.25           | 15.18              | 4.1229               | 2.3853                  | 0.9935                   |
| $\alpha$           | 35.15%        | 0.104%        | 35.15%          | 0.104%          | 25.21           | 13.67              | 3.9618               | 2.1476                  | 0.9939                   |
| $\alpha$           | 51.40%        | 0.130%        | 51.40%          | 0.130%          | 28.31           | 29.95              | 4.4360               | 4.6922                  | 0.9909                   |
| $\alpha$           | 54.16%        | 0.143%        | 54.16%          | 0.143%          | 30.29           | 35.79              | 4.7397               | 5.5998                  | 0.9897                   |
| $\alpha$           | 58.55%        | 0.182%        | 58.55%          | 0.182%          | 34.83           | 49.19              | 5.4351               | 7.6759                  | 0.9869                   |
| $\alpha + \beta H$ | 71.19%        | 30.28%        | 71.19%          | 30.28%          | 37.23           | 92.02              | 5.7693               | 14.2585                 | 0.9800                   |
| $\alpha + \beta H$ | 70.74%        | 41.43%        | 70.74%          | 41.43%          | 39.91           | 96.47              | 6.1766               | 14.9312                 | 0.9789                   |
| $\alpha + \beta H$ | 70.48%        | 42.29%        | 70.48%          | 42.29%          | 35.64           | 85.09              | 5.5304               | 13.2022                 | 0.9813                   |
| $\alpha + \beta H$ | 70.18%        | 44.85%        | 70.18%          | 44.85%          | 38.68           | 91.03              | 5.9934               | 14.1046                 | 0.9799                   |
| $\alpha + \beta H$ | 70.06%        | 51.80%        | 70.06%          | 51.80%          | 41.42           | 96.95              | 6.4095               | 15.0010                 | 0.9786                   |
| $\alpha + \beta H$ | 70.65%        | 67.59%        | 70.65%          | 67.59%          | 42.01           | 101.09             | 6.4949               | 15.6309                 | 0.9779                   |
| $\alpha + \beta H$ | 71.19%        | 92.60%        | 71.19%          | 92.60%          | 34.42           | 85.06              | 5.3419               | 13.1996                 | 0.9815                   |
| $\alpha + \beta H$ | 71.39%        | 99.75%        | 71.39%          | 99.75%          | 35.42           | 88.39              | 5.4927               | 13.7077                 | 0.9808                   |
| $\beta H$          | 74.80%        | 99.81%        | 74.80%          | 99.81%          | 30.19           | 89.63              | 4.6850               | 13.9081                 | 0.9814                   |
| $\beta H$          | 80.61%        | 99.90%        | 80.61%          | 99.90%          | 18.66           | 77.56              | 2.9064               | 12.0794                 | 0.9850                   |
| $\beta H$          | 89.24%        | 99.94%        | 89.24%          | 99.94%          | 8.74            | 72.43              | 1.3640               | 11.3075                 | 0.9873                   |
| $\beta H$          | 88.63%        | 99.94%        | 88.63%          | 99.94%          | 10.40           | 81.12              | 1.6217               | 12.6440                 | 0.9857                   |
| 4HBA-Hydrate       | 100.00%       | 100.00%       | 100.00%         | 100.00%         | 0.00            | 69.740             | 0.0000               | 10.9070                 | 0.9891                   |

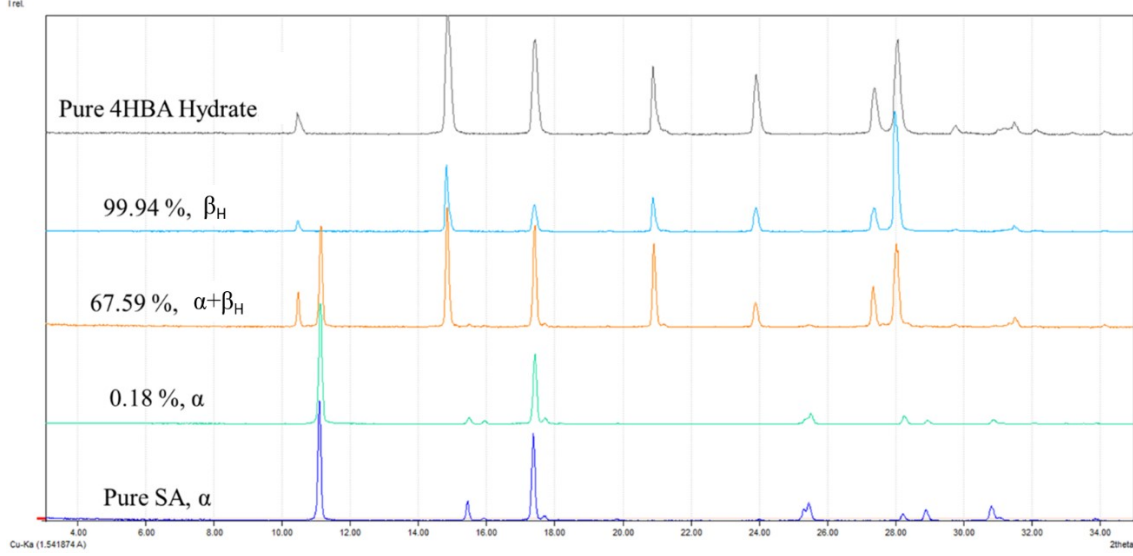

Figure 2. XRPD of SA-4HBA (monohydrate) of (select) solid phase samples from SLE study in 40 w% MeOH in H<sub>2</sub>O

### Fitting the Liquid BIPs $\Delta g_{12}^L$ and $\Delta g_{21}^L$

For the liquid-state NRTL BIPs of 4-hydroxybenzoic acid (1) and salicylic acid (2),  $\Delta g_{12}^L$  and  $\Delta g_{21}^L$  were not expressed as functions of temperature due to the sparsity of solid-liquid equilibrium melt data (i.e., the SSLE data at the eutectic temperature).

During the regression of these parameters it was noted that a wide range of parameter values for  $\Delta g_{12}^L$  and  $\Delta g_{21}^L$  would give decent predictions of the SSLE data. As a result, a more in-depth study was performed to assess the degeneracy of the liquid parameters with respect to the SSLE criteria which must be satisfied simultaneously:

$$\{\gamma_i^\alpha x_i^\alpha f_i^S / f_i^L = \gamma_i^L x_i^L = \gamma_i^\beta x_i^\beta f_i^S / f_i^L\}_{i=1,2} \quad (S1)$$

Numerically, the regression procedure requires determination of the parameters  $\Delta g_{12}^L$  and  $\Delta g_{21}^L$  to calculate  $\gamma_i^L$  (provided known values of  $\Delta g_{12}^S$  and  $\Delta g_{21}^S$ , which we obtained from regressing the solvus data to the T-dependent expressions described in the text, and hence known values of  $\gamma_i^S$ ). This was done by driving the objective function shown below to zero:

$$OF = \sum_{i=1}^2 (\gamma_i^\alpha x_i^\alpha f_i^S / f_i^L - \gamma_i^L x_i^L)^2 + (\gamma_i^\beta x_i^\beta f_i^S / f_i^L - \gamma_i^L x_i^L)^2 \quad (S2)$$

Because there are only two regression parameters in the above equation ( $\Delta g_{12}^L$  and  $\Delta g_{21}^L$ ), one can easily visualize how the OF varies with the parameter values. A contour plot showing this functional dependency is illustrated below:

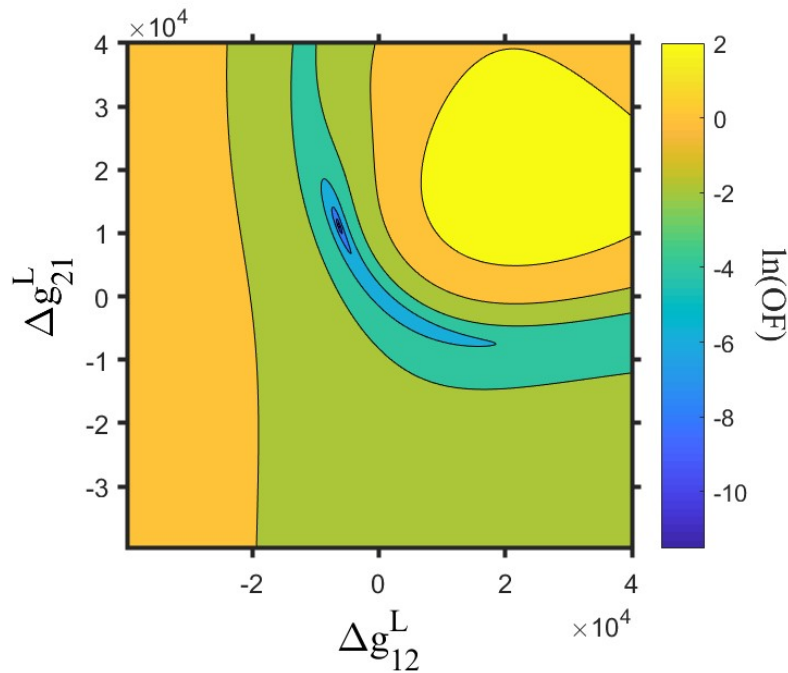

Figure 3: Objective function at SSLE, with varying values of  $\Delta g_{12}^L$  and  $\Delta g_{21}^L$ .

Clearly, there is a wide range of parameter space over which the objective function is quite close to zero (e.g.,  $< e^{-4} = 0.0183$ ). Such degeneracy or relative “flatness” in the parameter space can make it difficult to converge at a single parameter set when different initial guesses are employed. Therefore, we focused-in on the lowest OF region, as shown below, and restricted our initial guesses for the parameters to be sufficiently close to the absolute minimum, thereby allowing the regression algorithm to more-easily converge to the global-minimum. Alternatively, the minimum value can be approximately read off the graph.



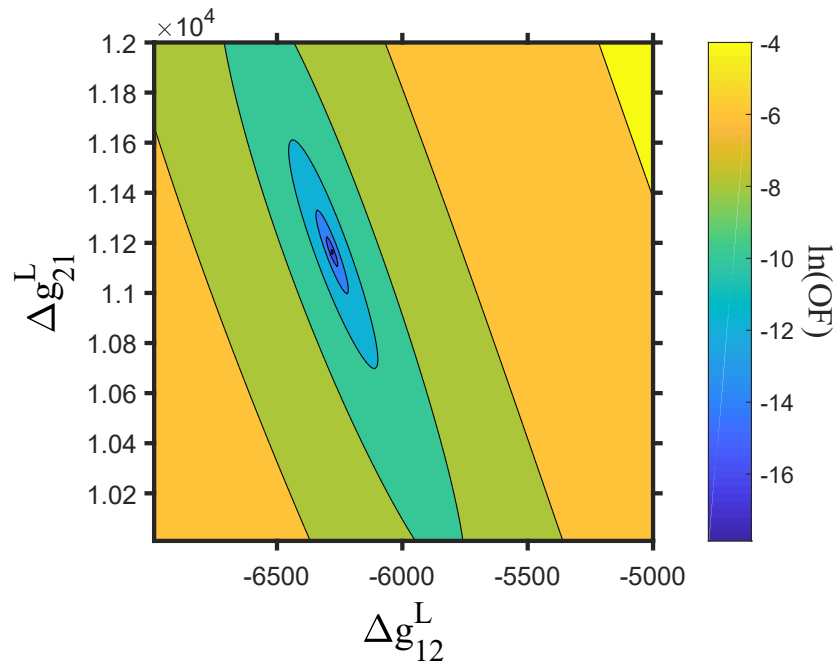

Figure 4: Zoomed-view of Figure 3.
